# Supplementary material
Source: publisher site journal article supplement (http://www.sagepub.com/logiostudy/SupplementalReadings/Part_IV%20Quizzes%20and%20Projects.doc)
Supplement: Supplementary file 1 [file Part_IV%20Quizzes%20and%20Projects.doc]

**Part IV**

**REVIEW QUIZ**

NAME______________________________________
INSTRUCTOR_______________________________
DATE________________________________________

(1) POLREC, CHRISTN, and RSATTND were all used to create an index of ___________________ to predict approval of abortion.

(2) If one (1) point was given to respondents' index scores for each item from a set of three (3) that indicated an attitude, their scores could range from ___________________ to__________________

(3) The SPSS procedure that can be used to check an index prior to employing the index in analysis is .

(4) In the GSS sample, it was found that the higher people are on the Political-Religious index, the more likely they were to say that homosexuality is _____________________________.

**Part IV**

**Independent Project**

NAME______________________________________
INSTRUCTOR_______________________________
DATE________________________________________

Examine the frequency distributions of the four variables in the GSS.SAV data file that measure religiosity (PRAY, CHATT, POSTLIFE). Examine the bivariate relationships between these variables and the attitude toward gun control laws (GUNLAW).

Do you see a pattern? Do respondents who score higher in religiosity (pray more, attend church more, believe in life after death) favor or oppose gun control laws?

Recode the religiosity variables as necessary. Create a religiosity index using the COMPUTE and/or COUNT commands in SPSS. Once the index is complete, test the bivariate relationship between religiosity and attitudes toward gun control laws.

Fill in the following information:

**RELATIONSHIP BETWEEN RELIGIOSITY AND GUN CONTROL
(percentages)**

**Religiosity Index**

**0 1 2 3**

***Gun Control Oppose***

***Support***

Do you see a relationship between religiosity and attitudes about gun control? What is the relationship? Would this be a positive or a negative relationship? Does a chi-square statistic show statistical significance?
